# Supplementary material for: In situ crosslinked smart polypeptide nanoparticles for multistage responsive tumor-targeted drug delivery
Source: Royal Society of Chemistry journal article supplement (doi:10.1039/c5nr07348k), 2016-01-01
Supplement: c5nr07348k1.pdf [file c5nr07348k1.pdf]

## Supporting Information

### **In situ crosslinked smart polypeptide nanoparticles for multistage responsive tumor-targeted drug delivery**

Huqiang Yi <sup>†a</sup>, Peng Liu <sup>†a</sup>, Nan Sheng<sup>a</sup>, Ping Gong<sup>a</sup>, Yifan Ma<sup>\*a</sup>, Lintao Cai<sup>\*a</sup>

- a. Guangdong Key Laboratory of Nanomedicine, Key Lab for Health Informatics of Chinese Academy of Sciences, Shenzhen Institutes of Advance Technology, Chinese Academy of Sciences, Shenzhen 518055, PR China

<sup>†</sup> H Yi & P Liu contributed equally to this work.

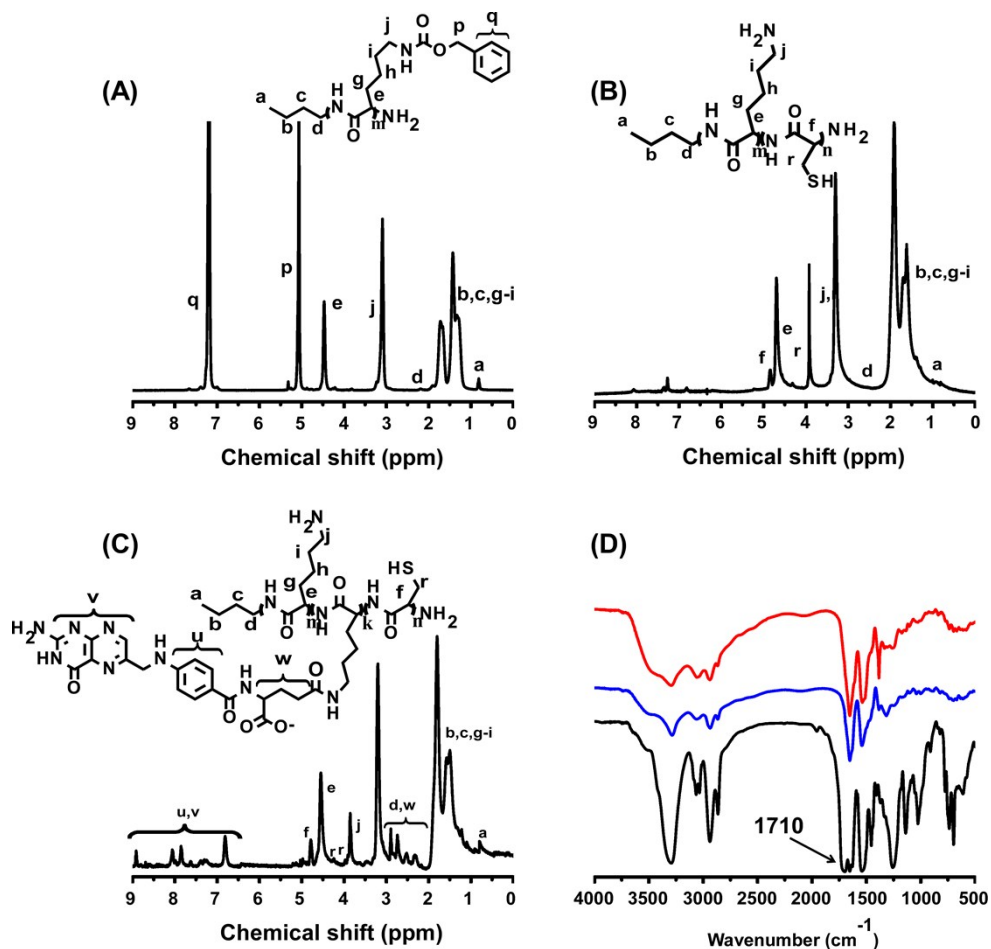

**Fig S1.** Characterizations of the copolymers. (A)  $^1\text{H}$  NMR spectrum of PLLZ-b-PLCZ copolymers. (B)  $^1\text{H}$  NMR spectrum of FA-PLL(DCA)-b-PLC copolymers. (C)  $^1\text{H}$  NMR spectrum of FA-PLL-b-PLC copolymers. (D) FT-IR spectrum of PLLZ (black) PLL-b-PLC (blue) and FA-PLL-b-PLC (red) copolymers.

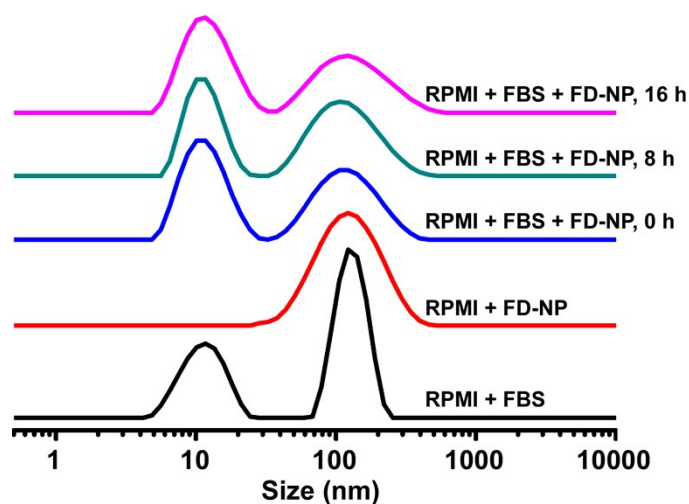

**Fig S2.** Size distribution of FD-NP determined by DLS. The nanoparticles were incubated at 37 °C with RPMI 1640 culture medium at pH 7.4

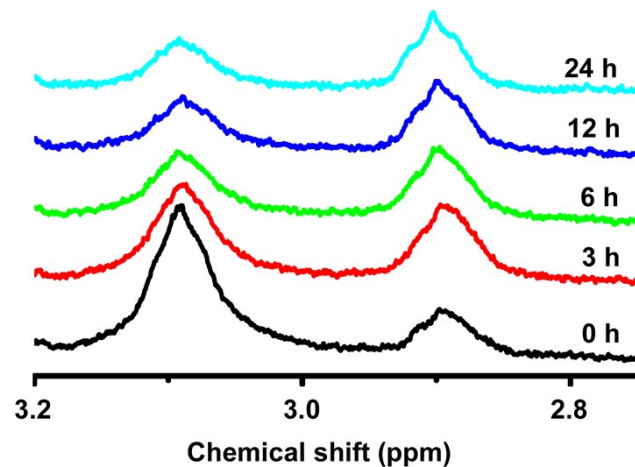

Fig S3. Hydrolysis of FD-NP at pH 7.4 detected by  $^1\text{H}$  NMR.

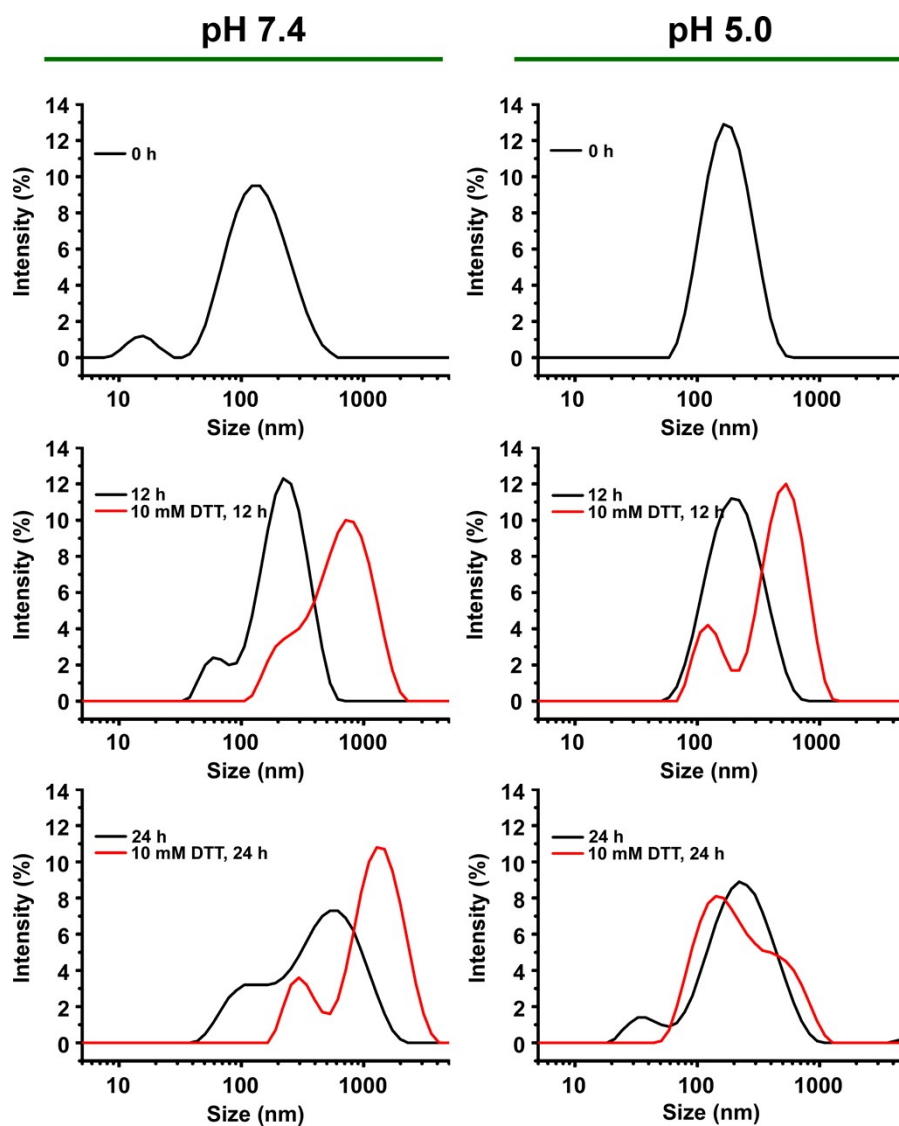

Fig S4. Redox and pH-induced size distribution changes of FD-NP in time followed by DLS.

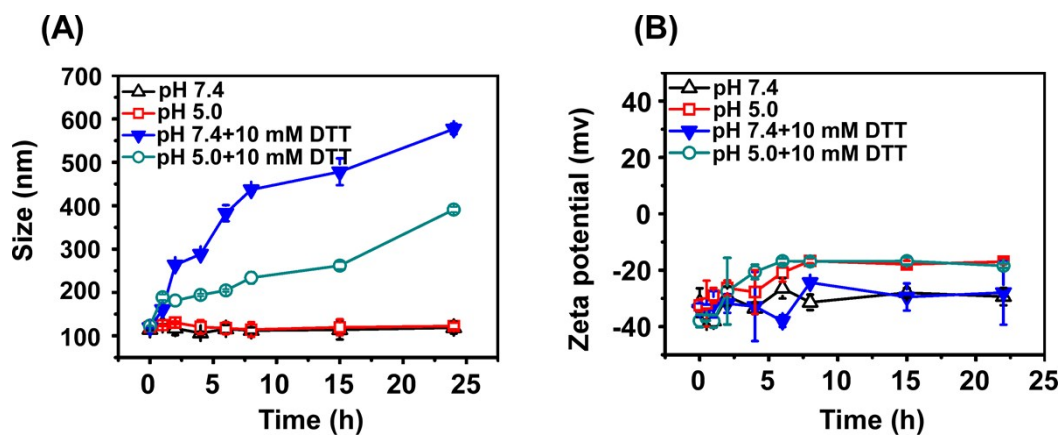

**Fig S5.** Redox and pH-induced size and zeta potential changes of FS-NP. (A) Z-average size analyses. (B) Zeta potential changes. FS-NPs were incubated at 37 °C ± 10 mM DTT at pH 7.4 and 5.0. Data are shown as mean ± SD (n = 3).

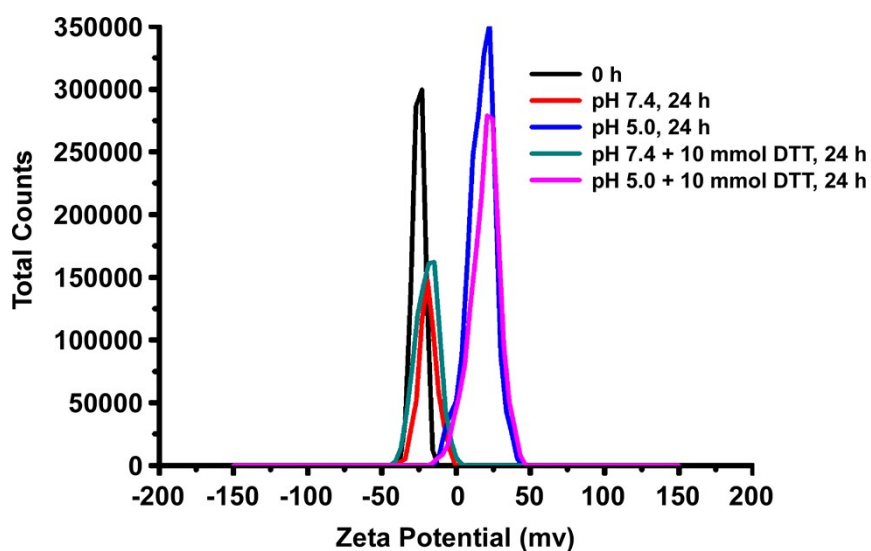

**Fig S6.** Redox and pH-induced zeta potential distribution changes of FD-NPs measured by Nano-ZS ZEN3600.

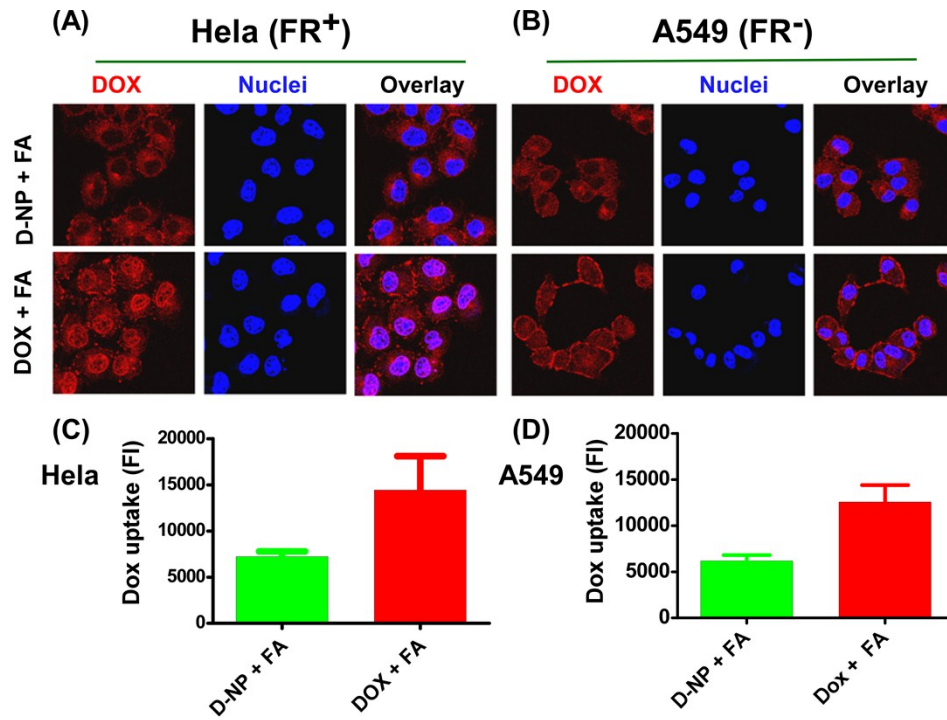

**Fig S7.** The intracellular localization and cellular uptake of nanoparticles by HeLa and A549 cells. The cells were incubated with DOX-loaded D-NP and free DOX (10  $\mu\text{g}/\text{mL}$ ) + FA (100  $\mu\text{g}/\text{mL}$ ). The intracellular localization of DOX in (A) HeLa and (B) A549 cells were recorded at 0.5 h using CLSM. The cellular uptake of DOX in (C) HeLa and (D) A549 cells was determined at 0.5 h by measuring DOX positive cells using flow cytometry. Total fluorescence intensity (FI) = % of positive cells  $\times$  mean fluorescence intensity. Cells were labeled with hoechst to identify nuclei (Blue). Magnification:  $\times 63$ . Bars shown are mean  $\pm$  SE (n = 4).

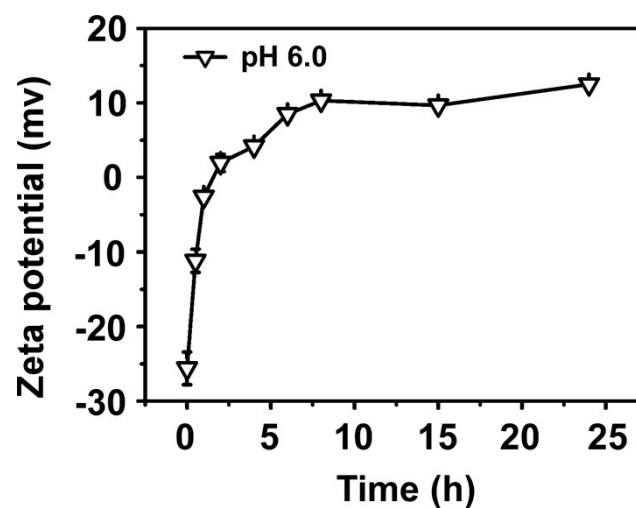

**Fig S8.** The zeta potential changes of FD-NP at pH 6.0. Data are shown as mean  $\pm$  SD (n = 3).

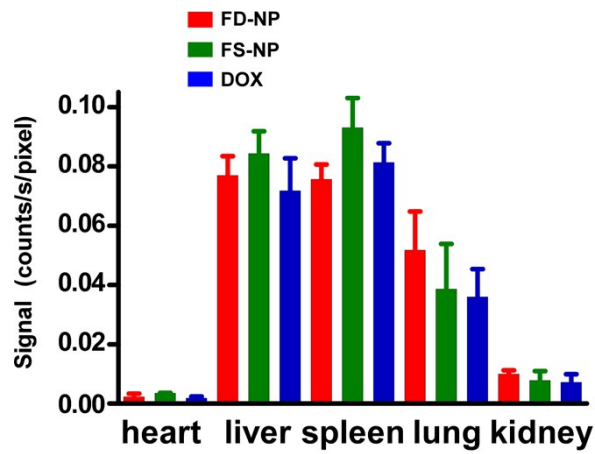

**Fig S9.** Fluorescence signals of Dir in excised organs at 48 h. Tumor-bearing mice were i.v. injected with Dir + DOX loaded nanoparticles (FD-NP, FS-NP) and Dir + DOX respectively. Bars shown are mean $\pm$ SE (n = 3).

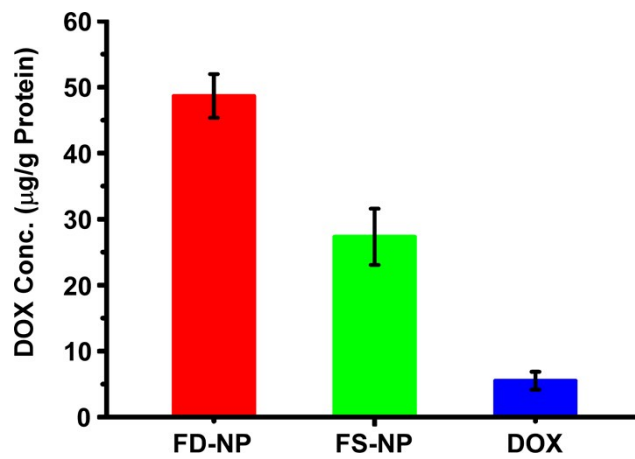

**Fig S10.** The amount of DOX in tumor tissues was quantified by fluorescence spectrophotometer at 48 h after iv administration of Dir + DOX loaded nanoparticles (FD-NP, FS-NP) and Dir + DOX respectively (DOX: 10 µg/mouse). Bars shown are mean  $\pm$  SE.
